# Supplementary material
Source: PubMed Central journal article supplement (PMC3707542)
Supplement: supp_pp.113.217729_217729Supplemental_Data.pdf [file supp_pp.113.217729_217729Supplemental_Data.pdf]

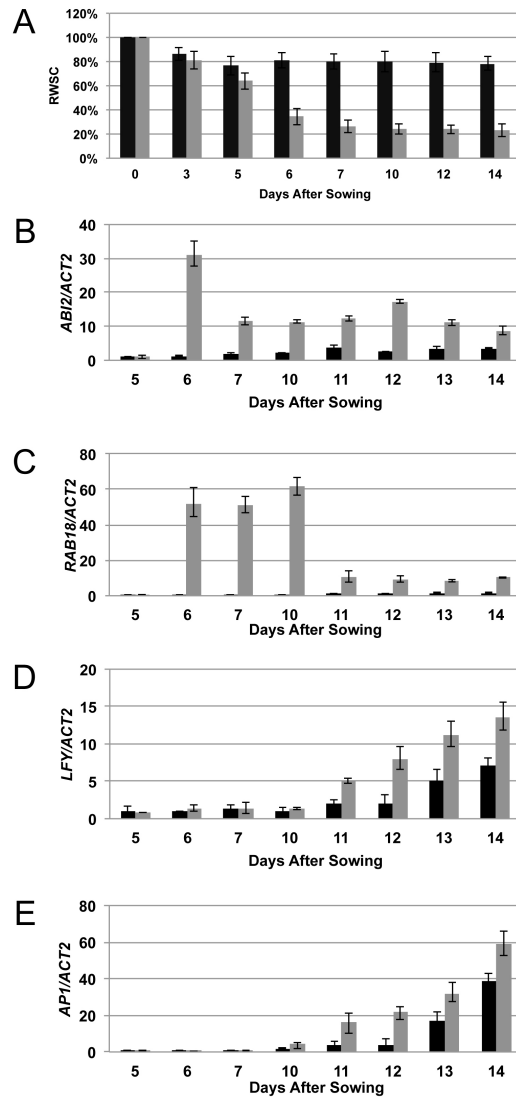

**Figure S1.** DE Response Induction in Arabidopsis.

**(A)** Mean relative soil water content (RSWC) values in Arabaskets pots of plants undergoing normal watering (NW, black bar) and low watering (LW, grey bar) treatments. Pots (n = 17) were weighed at the indicated days in 16 h light / 8 h dark photoperiod.

**(B) to (E)** Real-time qPCR transcript analyses of ABA and floral markers in wild-type (Col-0) plants grown under a 16 h light / 8 h dark photoperiod as detailed in **(A)**. At least 20 seedlings from 3 different pots were harvested at the indicated days after sowing at Zeitgeber time 8. Values represent fold change variations of *ABI2* **(B)**, *RAB18* **(C)**, *LFY* **(D)** and *API1* **(E)** transcript levels relatively to day 5. *ACTIN2* expression (*ACT2*) was used for normalization; error bars represent SE of two technical replicates. A representative experiment of two biological replicates is shown.

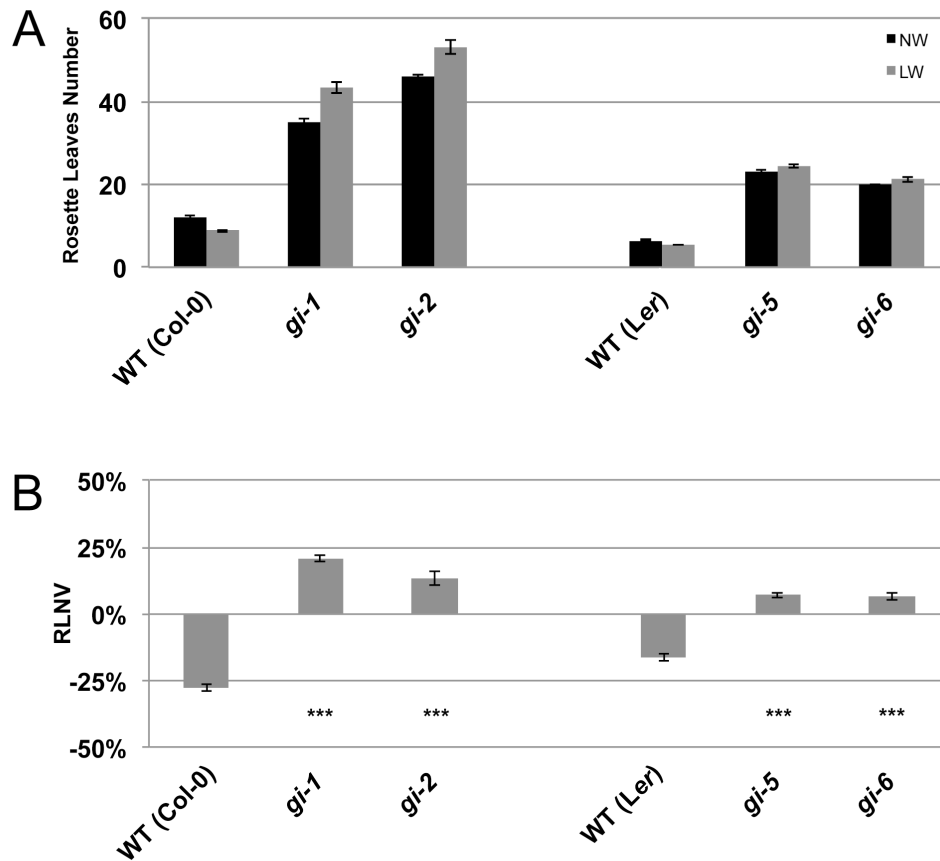

**Figure S2.** Absence of DE Response in Independent *gi* Alleles.

**(A)** Rosette leaves mean number of wild type and *gi* mutants grown under LDs. Plants were subjected to NW (black bars) or LW (grey bars) regimes. Error bars represent  $\pm$  SE  $n = 15$ .

**(B)** Quantification of DE response for each genotype detailed in **(A)** expressed as relative leaves number variation (RLNV). Error bars represent  $\pm$  SE, Student's *t* test *P* values  $\leq 0.001$  (\*\*\*).

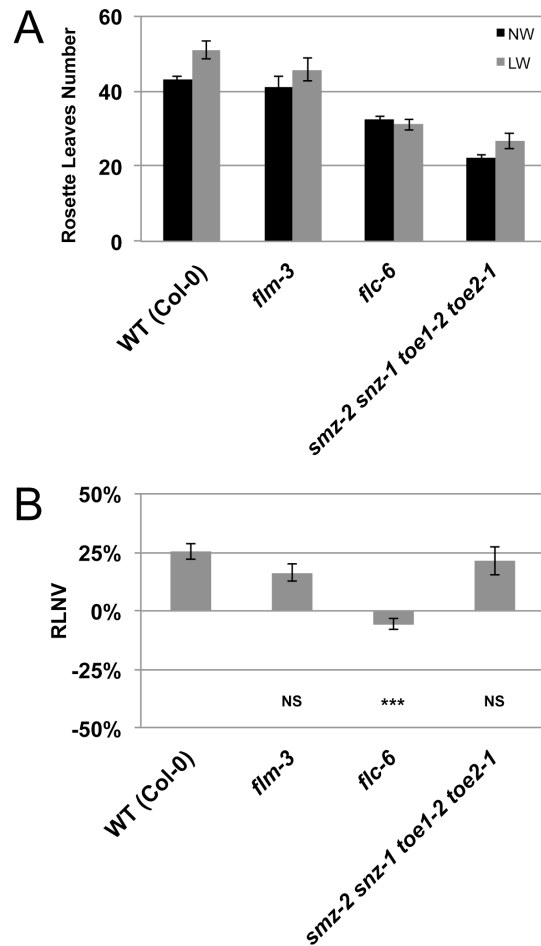

**Figure S3.** DE Response in Floral Repressors Mutants Under SDs.

**(A)** Rosette leaves mean number of wild-type and the indicated floral repressor mutants grown under SDs (10 h light / 14 h dark). Plants were subjected to NW (black bars) or LW (grey bars) regimes. Error bars represent  $\pm$  SE n = 17.

**(B)** Quantification of DE response for each genotype detailed in **(A)** expressed as RLNV. Error bars represent  $\pm$  SE, Student's t test P values  $\leq 0.001$  (\*\*\*),  $> 0.05$  not significant (NS).

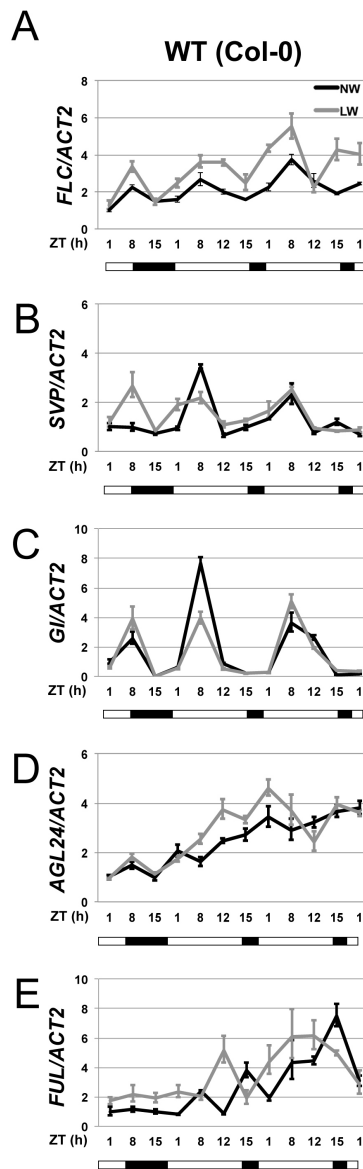

**Figure S4.** Floral Genes Regulation Under Drought Stress Upon SDs to LDs Shifts.

(A) to (E) Real-time qPCR of floral genes transcripts in 3 week-old wild-type seedlings. Plants were subjected to NW (black lines) or LW (grey lines) regimes and harvested at the indicated time points (Zeitgeber, ZT) in coincidence with the light phase (open bar) or in the dark (black bar) during a SDs to LDs shift. At each time point, values represent fold change variations of transcript levels of *FLC* (A), *SVP* (B), *GI* (C), *AGL24* (D) and *FUL* (E) relatively to the first ZT1 (arbitrarily set at 1 in normal watering control). *ACT2* expression was used for normalization; error bars represent SD of two technical replicates. A representative experiment of two biological replicates is shown.

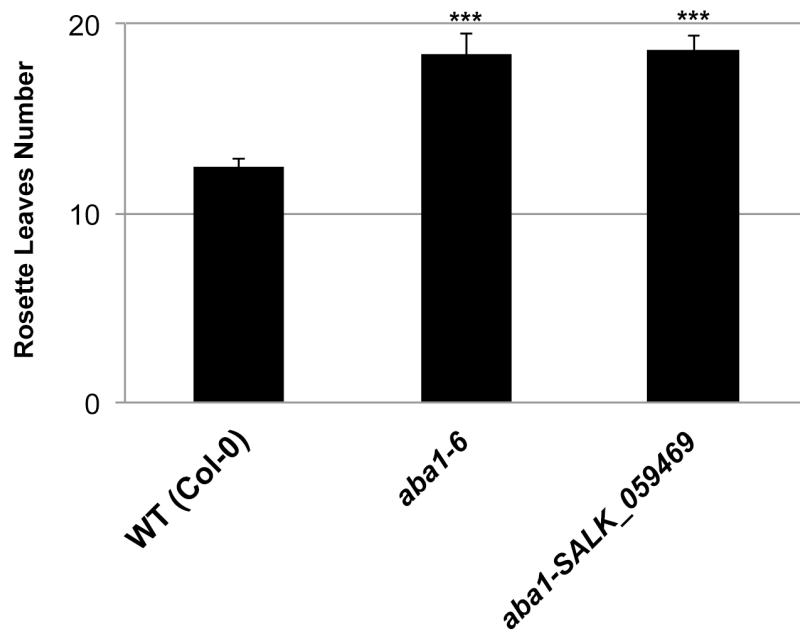

**Figure S5.** Mean Rosette Leaves Number in *aba1* mutants.

Rosette leaves mean number of wild-type and the indicated *aba1* alleles grown under LDs (16 h light / 8 h dark). Error bars represent  $\pm$  SE n = 9 to 17. \*\*\* indicate Student's t test P values  $\leq$  0.001.

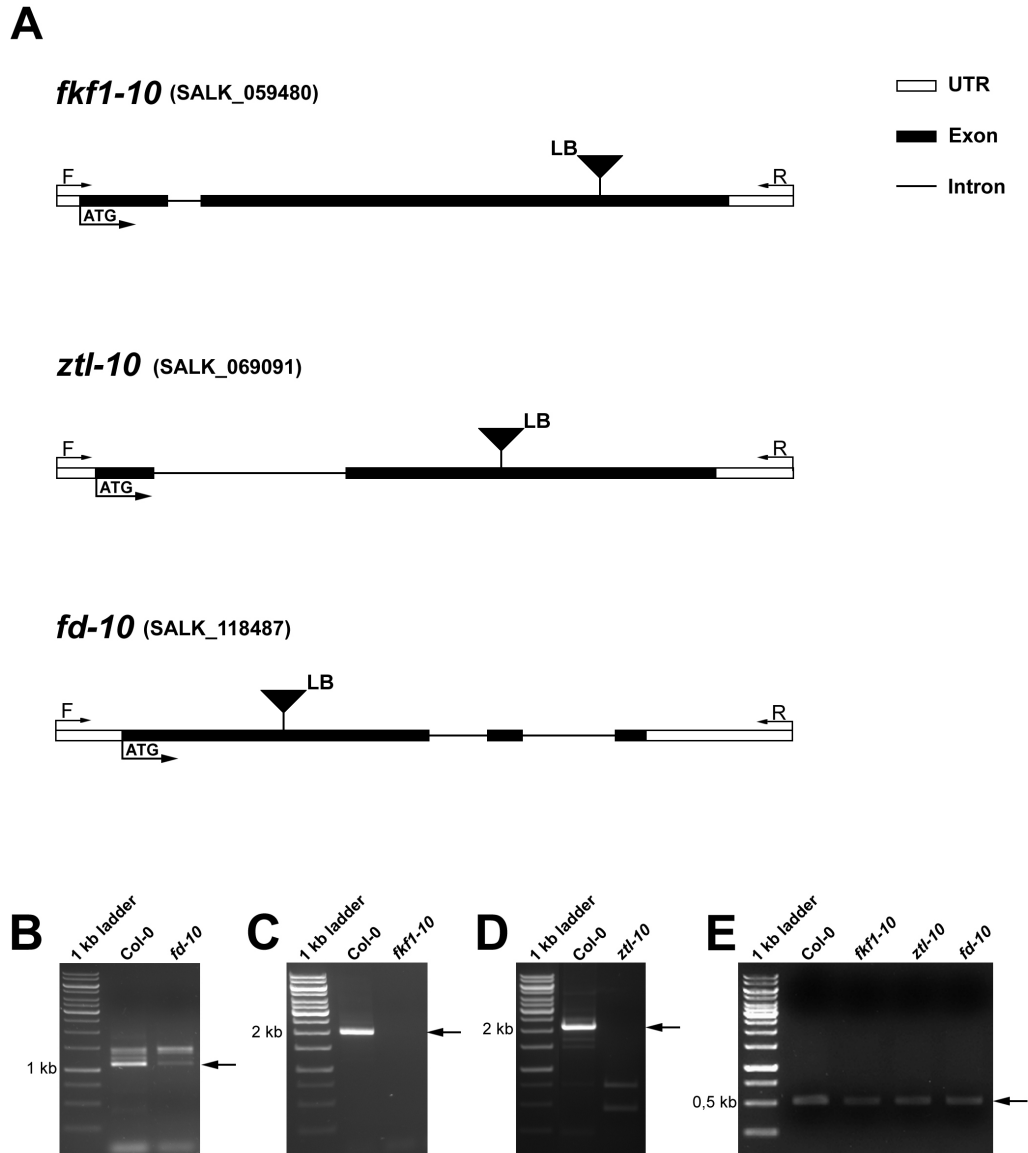

**Figure S6.** Characterization of T-DNA Insertion Alleles of *FD*, *FKF1* and *ZTL*.

(A) Diagram illustrating the T-DNA insertion alleles of *FD*, *FKF1* and *ZTL*. The positions of the forward (F) and reverse (R) primers used for RT-PCR and the T-DNA Left Board (LB) orientation are shown. (B) to (E) RT-PCR analysis from total cDNA derived from wild-type and the indicated mutant plants. Gene-specific primers illustrated in (A) were used to amplify *FD* (B), *FKF1* (C), *ZTL* (D) and *ACT2* (E). Arrows indicate the expected size band. PCR was conducted for 40 cycles except for *ACT2* (25 cycles). PCR products were visualized with Ethidium Bromide on an Agarose gel.

**Table S1**

| Figure      | Genotype                         | Normal Watering |       |        | Low Watering |       |           | P (NW vs. LW) |
|-------------|----------------------------------|-----------------|-------|--------|--------------|-------|-----------|---------------|
|             |                                  | VL              | SE    | range  | VL           | SE    | range     |               |
| 1 A         | WT (Col-0)                       | 12.6            | ±0.3  | 11–15  | 9.4          | ±0.3  | 8–12      | < .0001       |
|             | <i>cry2-1</i>                    | 32.1            | ±1.1  | 28–44  | 28.5         | ±0.6  | 23–31     | = .009781     |
|             | <i>fkf1-10</i>                   | 44.0            | ±0.8  | 41–49  | 36.0         | ±0.7  | 33–41     | < .0001       |
|             | <i>ztl-10</i>                    | 15.1            | ±0.4  | 13–19  | 10.8         | ±0.2  | 10–12     | < .0001       |
|             | <i>gi-100</i>                    | 54.6            | ±0.6  | 51–59  | 65.4         | ±1.3  | 56–72     | < .0001       |
|             | <i>gi-100 soc1-2</i>             | 75.3            | ±1.2  | 67–84  | 94.6         | ±1.0  | 88–103    | < .0001       |
|             | <i>co-10</i>                     | 44.6            | ±0.5  | 41–49  | 35.6         | ±0.4  | 33–38     | < .0001       |
|             | <i>ft-10</i>                     | 39.7            | ±0.8  | 33–44  | 29.7         | ±0.7  | 23–34     | < .0001       |
|             | <i>tsf-1</i>                     | 14.6            | ±0.4  | 13–18  | 10.5         | ±0.5  | 8–14      | < .0001       |
|             | <i>ft-10 tsf-1</i>               | 55.2            | ±0.8  | 51–62  | 60.2         | ±0.8  | 53–64     | = .000228     |
|             | <i>smz-D</i>                     | 50.2            | ±0.5  | 47–53  | 34.8         | ±0.9  | 29–43     | < .0001       |
|             | <i>soc1-2</i>                    | 20.8            | ±0.4  | 18–24  | 20.8         | ±0.9  | 17–26     | = .992085     |
|             | <i>agl24-2</i>                   | 14.8            | ±0.4  | 12–18  | 10.6         | ±0.4  | 9–13      | < .0001       |
|             | <i>soc1-2 agl24-2</i>            | 34.0            | ±0.5  | 31–37  | 32.0         | ±0.4  | 30–35     | = .014153     |
|             | <i>fd-10</i>                     | 28.9            | ±0.6  | 25–34  | 21.1         | ±0.5  | 18–24     | < .0001       |
| <i>ld-1</i> | 78.4                             | ±1.7            | 67–88 | 68.0   | ±1.4         | 60–75 | = .000317 |               |
| 1 C         | WT (Ler)                         | 6.7             | ±0.1  | 6–7    | 5.7          | ±0.1  | 5–6       | < .0001       |
|             | <i>fha-3</i>                     | 10.2            | ±0.3  | 8–13   | 8.7          | ±0.3  | 7–11      | = .007010     |
|             | <i>phyA-205</i>                  | 7.8             | ±0.3  | 6–10   | 6.3          | ±0.2  | 5–8       | = .001191     |
|             | <i>gi-4</i>                      | 27.4            | ±0.5  | 24–31  | 29.7         | ±1.0  | 26–32     | = .046167     |
|             | <i>co-2</i>                      | 22.2            | ±0.5  | 18–26  | 17.5         | ±0.5  | 12–22     | < .0001       |
|             | <i>ft-1</i>                      | 21.3            | ±0.3  | 19–25  | 18.2         | ±0.2  | 16–20     | < .0001       |
|             | <i>soc1-1</i>                    | 15.2            | ±0.2  | 14–17  | 15.1         | ±0.3  | 13–17     | = .866151     |
|             | <i>ful-1</i>                     | 8.8             | ±0.2  | 8–10   | 6.7          | ±0.2  | 6–8       | < .0001       |
|             | <i>gal-3</i>                     | 11.4            | ±0.4  | 9–14   | 8.7          | ±0.3  | 7–11      | < .0001       |
|             | <i>fy-1</i>                      | 13.8            | ±0.5  | 12–17  | 10.4         | ±0.3  | 9–12      | < .0001       |
|             | <i>fve-1</i>                     | 19.2            | ±0.4  | 17–22  | 16.2         | ±0.4  | 14–19     | < .0001       |
|             | <i>fca-1</i>                     | 31.4            | ±1.0  | 23–44  | 25.2         | ±0.5  | 20–28     | = .001037     |
| 2 A         | WT (Col-0)                       | 79.5            | ±0.8  | 77–87  | 86.7         | ±1.7  | 79–97     | = .003456     |
|             | <i>gi-2</i>                      | 99.2            | ±1.9  | 81–111 | 108.9        | ±3.4  | 88–130    | = .0021275    |
|             | <i>flc-6</i>                     | 74.6            | ±1.0  | 68–81  | 74.5         | ±1.0  | 69–77     | = .952723     |
|             | <i>smz-2 snz-1 toe1-2 toe2-1</i> | 45.5            | ±0.6  | 41–49  | 53.6         | ±1.5  | 48–59     | < .0001       |
|             | <i>svp-41</i>                    | 22.9            | ±0.6  | 19–27  | 18.3         | ±0.6  | 13–22     | < .0001       |
|             | <i>35S:HA-GI</i>                 | 42.2            | ±2.6  | 28–51  | 32.9         | ±2.9  | 18–41     | = .020842     |
| 2 A         | WT (Ler)                         | 49.6            | ±0.6  | 44–52  | 48.2         | ±0.5  | 44–52     | = .063810     |
|             | <i>35S:GI</i>                    | 17.1            | ±0.3  | 15–19  | 14.5         | ±0.3  | 13–16     | < .0001       |
|             | <i>35S:SOCl</i>                  | 15.1            | ±0.5  | 13–19  | 16.1         | ±0.8  | 12–23     | = .288215     |
|             | <i>35S:GI/- 35S:SOCl/-</i>       | 10.4            | ±0.4  | 8–14   | 9.9          | ±0.4  | 7–13      | = .297334     |

|            |                              |             |      |        |              |      |        |           |
|------------|------------------------------|-------------|------|--------|--------------|------|--------|-----------|
|            | <i>fve-1</i>                 | <b>60.6</b> | ±0.8 | 54–65  | <b>74.5</b>  | ±1.4 | 69–84  | < .0001   |
|            | <i>fca-1</i>                 | <b>89.6</b> | ±0.9 | 85–95  | <b>100.8</b> | ±1.5 | 86–106 | = .000309 |
| <b>2 B</b> | WT (Col-0)                   | <b>12.9</b> | ±0.5 | 10–16  | <b>9.4</b>   | ±0.3 | 7–12   | < .0001   |
|            | <i>flc-6</i>                 | <b>10.9</b> | ±0.1 | 10–11  | <b>7.6</b>   | ±0.2 | 7–9    | < .0001   |
|            | <i>flm-3</i>                 | <b>11.5</b> | ±0.4 | 8–14   | <b>8.6</b>   | ±0.3 | 7–10   | < .0001   |
|            | <i>svp-41</i>                | <b>5.9</b>  | ±0.1 | 5–7    | <b>5.3</b>   | ±0.1 | 5–6    | = .000327 |
|            | <i>35S:SVF</i>               | <b>24.3</b> | ±0.5 | 22–28  | <b>19.9</b>  | ±0.5 | 18–23  | < .0001   |
|            | WT ( <i>Ler</i> )            | <b>7.7</b>  | ±0.1 | 6–7    | <b>6.4</b>   | ±0.1 | 5–6    | = .000353 |
|            | <i>35S:SOC1</i>              | <b>5.3</b>  | ±0.2 | 4–6    | <b>5.4</b>   | ±0.2 | 4–6    | = .500149 |
|            | <i>35S:GI</i>                | <b>5.5</b>  | ±0.1 | 5–6    | <b>5.8</b>   | ±0.1 | 5–6    | = .170316 |
| <b>3 A</b> | WT (Col-0)                   | <b>12.9</b> | ±0.3 | 11–15  | <b>9.7</b>   | ±0.2 | 9–11   | < .0001   |
|            | <i>aba1-6</i>                | <b>15.5</b> | ±0.3 | 13–17  | <b>13.9</b>  | ±0.5 | 11–17  | = .021215 |
|            | <i>aba2-4</i>                | <b>14.5</b> | ±0.3 | 13–16  | <b>11.7</b>  | ±0.3 | 10–14  | < .0001   |
|            | <i>hab1-1 abil-2 pp2ca-1</i> | <b>10.7</b> | ±0.2 | 10–11  | <b>8.2</b>   | ±0.3 | 7–9    | < .0001   |
|            | <i>hab1-1 abil-2 abi2-2</i>  | <b>9.8</b>  | ±0.4 | 6–15   | <b>7.6</b>   | ±0.2 | 6–10   | < .0001   |
| <b>3 E</b> | WT (Col-0)                   | <b>80.5</b> | ±1.3 | 62–84  | <b>87.5</b>  | ±1.7 | 81–103 | = .002435 |
|            | <i>aba1-6</i>                | <b>85.3</b> | ±2.3 | 71–96  | <b>92.0</b>  | ±1.6 | 81–99  | = .025848 |
|            | <i>hab1-1 abil-2 pp2ca-1</i> | <b>99.7</b> | ±1.3 | 88–106 | <b>103.4</b> | ±2.0 | 95–119 | = .023857 |

| Figure     | Genotype             | VL          | SE   | range | <i>P</i> | vs.           |
|------------|----------------------|-------------|------|-------|----------|---------------|
| <b>4 G</b> | WT (Col-0)           | <b>12.5</b> | ±0.4 | 10–16 |          |               |
|            | <i>aba1-6</i>        | <b>16.4</b> | ±0.3 | 15–18 | < .0001  | Col-0         |
|            | <i>soc1-2</i>        | <b>25.4</b> | ±0.8 | 23–29 | < .0001  | Col-0         |
|            | <i>soc1-2 aba1-6</i> | <b>29.5</b> | ±0.7 | 26–33 | = .00057 | <i>soc1-2</i> |
|            | <i>svp-41</i>        | <b>5.7</b>  | ±0.2 | 5–6   | < .0001  |               |
|            | <i>svp-41 aba1-6</i> | <b>6.5</b>  | ±0.2 | 5–8   | = .02488 | <i>svp-41</i> |

|            |                      |             |      |       |           |               |
|------------|----------------------|-------------|------|-------|-----------|---------------|
| <b>4 H</b> | WT (Col-0)           | <b>81.5</b> | ±0.9 | 77–87 |           |               |
|            | <i>aba1-6</i>        | <b>83.8</b> | ±2.6 | 71–99 | = .102985 | Col-0         |
|            | <i>svp-41</i>        | <b>20.5</b> | ±0.8 | 16–26 |           |               |
|            | <i>svp-41 aba1-6</i> | <b>32.6</b> | ±1.2 | 25–40 | < .0001   | <i>svp-41</i> |

| Figure    | Genotype          | Normal Watering |      |       | Low Watering |      |       | <i>P</i> (NW vs. LW) |
|-----------|-------------------|-----------------|------|-------|--------------|------|-------|----------------------|
|           |                   | VL              | SE   | range | VL           | SE   | range |                      |
| <b>S2</b> | WT (Col-0)        | <b>12.2</b>     | ±0.4 | 10–15 | <b>8.8</b>   | ±0.3 | 7–11  | < .0001              |
|           | <i>gi-1</i>       | <b>35.1</b>     | ±1.0 | 29–41 | <b>43.4</b>  | ±1.5 | 32–58 | < .0001              |
|           | <i>gi-2</i>       | <b>46.1</b>     | ±0.6 | 43–50 | <b>53.1</b>  | ±1.6 | 44–65 | = .000208            |
|           | WT ( <i>Ler</i> ) | <b>6.1</b>      | ±0.1 | 6–7   | <b>5.5</b>   | ±0.1 | 5–6   | < .0001              |



|           |                                  |             |      |       |             |      |       |           |
|-----------|----------------------------------|-------------|------|-------|-------------|------|-------|-----------|
|           | <i>gi-5</i>                      | <b>23.1</b> | ±0.5 | 21–27 | <b>24.4</b> | ±0.4 | 21–27 | = .026375 |
|           | <i>gi-6</i>                      | <b>19.8</b> | ±0.3 | 18–22 | <b>21.1</b> | ±0.5 | 18–26 | = .025683 |
| <b>S3</b> | WT (Col-0)                       | <b>43.0</b> | ±0.9 | 38–52 | <b>50.9</b> | ±2.4 | 33–69 | = .008682 |
|           | <i>ftm-3</i>                     | <b>41.0</b> | ±3.1 | 22–59 | <b>45.7</b> | ±3.0 | 34–64 | = .024636 |
|           | <i>ftc-6</i>                     | <b>32.4</b> | ±0.8 | 27–39 | <b>31.1</b> | ±1.4 | 24–43 | = .412885 |
|           | <i>smz-2 smz-1 toe1-2 toe2-1</i> | <b>22.2</b> | ±0.8 | 20–25 | <b>26.7</b> | ±2.0 | 17–39 | = .012685 |

| Figure    | Genotype                | VL          | SE   | range | <i>P</i> | vs.   |
|-----------|-------------------------|-------------|------|-------|----------|-------|
| <b>S5</b> | WT (Col-0)              | <b>12.4</b> | ±0.5 | 10–14 |          |       |
|           | <i>aba1-6</i>           | <b>18.4</b> | ±1.1 | 14–23 | < .0001  | Col-0 |
|           | <i>aba1-SALK_059469</i> | <b>18.6</b> | ±0.8 | 14–25 | < .0001  | Col-0 |

**Table S1.** Flowering time of mutant and transgenic plants used in this study.

Mean values of vegetative leaves (VL) and standard error (SE) of plants undergoing normal watering and low watering conditions. Two tailed Student's *t* test values (*P*) are shown.

**Table S2**

| <b>Allele</b>                    | <b>Background</b> | <b>Reference</b>                            |
|----------------------------------|-------------------|---------------------------------------------|
| <i>ld-1</i>                      | Col-1             | (Lee et al., 1994)                          |
| <i>fca-1</i>                     | <i>Ler</i>        | (Koornneef et al., 1991)                    |
| <i>fve-1</i>                     | <i>Ler</i>        | (Koornneef et al., 1991)                    |
| <i>fy-1</i>                      | <i>Ler</i>        | (Koornneef et al., 1991)                    |
| <i>cry2-1</i>                    | Col-4             | (Guo et al., 1999)                          |
| <i>fha-3</i>                     | <i>Ler</i>        | (Koornneef et al., 1991)                    |
| <i>fkf-10</i>                    | Col-0             | This work                                   |
| <i>ztl-10</i>                    | Col-0             | This work                                   |
| <i>gi-100</i>                    | Col-0             | (Huq et al., 2000)                          |
| <i>gi-1</i>                      | Col-1             | (Fowler et al., 1999)                       |
| <i>gi-2</i>                      | Col-1             | (Fowler et al., 1999)                       |
| <i>gi-4</i>                      | <i>Ler</i>        | (Fowler et al., 1999)                       |
| <i>gi-5</i>                      | <i>Ler</i>        | (Fowler et al., 1999)                       |
| <i>gi-6</i>                      | <i>Ler</i>        | (Fowler et al., 1999)                       |
| <i>35S:GI gi-3</i>               | <i>Ler</i>        | (Mizoguchi et al., 2005)                    |
| <i>35S:HA-GI gi-2</i>            | Col-0             | (David et al., 2006)                        |
| <i>phyA-205</i>                  | <i>Ler</i>        | (Reed et al., 1994)                         |
| <i>co-2</i>                      | <i>Ler</i>        | (Koornneef et al., 1991)                    |
| <i>co-10</i>                     | Col-0             | (Laubinger et al., 2006)                    |
| <i>ft-1</i>                      | <i>Ler</i>        | (Koornneef et al., 1991)                    |
| <i>ft-10</i>                     | Col-0             | (Yoo et al., 2005)                          |
| <i>tsf-1</i>                     | Col-0             | (Yamaguchi et al., 2005)                    |
| <i>ft-10 tsf-1</i>               | Col-0             | (Jang et al., 2009)                         |
| <i>fd-10</i>                     | Col-0             | This work                                   |
| <i>soc1-2</i>                    | Col-0             | (Lee et al., 2000)                          |
| <i>soc1-1</i>                    | <i>Ler</i>        | (Onouchi et al., 2000)                      |
| <i>gi-100 soc1-2</i>             | Col-0             | This work                                   |
| <i>35S:SOC1</i>                  | <i>Ler</i>        | Samach et al. 2000                          |
| <i>35S:GI -/35S:SOC1 -</i>       | Col-0             | This work                                   |
| <i>agl24-2</i>                   | Col-0             | (Michaels Scott D et al., 2003)             |
| <i>soc1-2 agl24-2</i>            | Col-0             | This work                                   |
| <i>ful-1</i>                     | <i>Ler</i>        | (Gu et al., 1998)                           |
| <i>svp-41</i>                    | Col-0             | (Hartmann et al., 2000)                     |
| <i>35S:SVP</i>                   | Col-0             | (Gregis et al., 2009)                       |
| <i>flc-6</i>                     | Col-0             | (Bouveret, 2006)                            |
| <i>flm-3</i>                     | Col-0             | (Bouveret, 2006)                            |
| <i>smz-2 snz-1 toe1-2 toe2-1</i> | Col-0             | (Mathieu et al., 2009)                      |
| <i>smz-D</i>                     | Col-0             | (Mathieu et al., 2009)                      |
| <i>aba1-SALK_059469</i>          | Col-0             | (Morris et al., 2006)                       |
| <i>aba1-6</i>                    | Col-0             | (Niyogi et al., 1998; Barrero et al., 2005) |
| <i>aba2-4</i>                    | Col-0             | (Laby et al., 2001)                         |
| <i>hab1-1 abi1-2 pp2ca-1</i>     | Col-0             | (Rubio et al., 2009)                        |
| <i>hab1-1 abi1-2 abi2-2</i>      | Col-0             | (Rubio et al., 2009)                        |

**Table S3**

| <b>Gene</b>   | <b>Forward</b>              | <b>Reverse</b>                      | <b>Use</b> |
|---------------|-----------------------------|-------------------------------------|------------|
| <i>ACT</i>    | CTCTCCCGCTATGTATGTCGCCA     | GTGAGACACACCATCACCAG                | qPCR       |
| <i>GI</i>     | AATTCAGCACGCGCCTATTG        | GTTGCTTCTGCTGCAGGAACTT              | qPCR       |
| <i>FT</i>     | CTAGCAACCCTCACCTCCGAGAATA   | CTGCCAAGCTGTCGAAACAATATAA           | qPCR       |
| <i>TSF</i>    | CTCGGGAATTCATCGTATTG        | CCCTCTGGCAGTTGAAGTAA                | qPCR       |
| <i>SOC1</i>   | ATCGAGGAGCTGCAACAGAT        | GCTACTCTCTTCATCACCTCTTCC            | qPCR       |
| <i>FLC</i>    | TGTGGATAGCAAGCTTGTGG        | TAGTCACGGAGAGGGCAGTC                | qPCR       |
| <i>SVP</i>    | CCGAAAACTGTTTCGAGTTC        | TGACTGCAAGTTATGCCTCTCT              | qPCR       |
| <i>AGL24</i>  | GAGGCTTTGGAGACAGAGTCGGTGA   | AGATGGAAGCCCAAGCTTCAGGGAA           | qPCR       |
| <i>FD</i>     | GCTCACTTGCAGGCAGAAAA        | CCTTTTCTCTTTCCGGGTCT                | qPCR       |
| <i>FUL</i>    | TTGCAAGATCACAACAATTCGCTTCT  | GAGAGTTTGGTTCCGTCAACGACGAT          | qPCR       |
| <i>LFY</i>    | ACGTGGCAAAAAGAACGGCTTAGA    | CGCGTACCTGAATACTTGGTTCGTC           | qPCR       |
| <i>AP1</i>    | AGGGAAAAAATCTTAGGGCTCAACAG  | GCGGCGAAGCAGCCAAGGTTGCAGTTG         | qPCR       |
| <i>RAB18</i>  | ATGGCGTCTTACCAGAACCGT       | CCAGATCCGGAGCGGTGAAGC               | qPCR       |
| <i>ABI2</i>   | GGAGTGACTIONCGATTGTGGTAGACG | GTCAAAGCCAGATGCATCCTCTCACG          | qPCR       |
| <i>ZTL</i>    | CCACTCGTTTTCTTTGTCCACC      | TGAACACAAAATGCACTTCTCAA             | RT-PCR     |
| <i>FKF1</i>   | AGGCTGAGAGCTTATCAGAGA       | TGTACACACGCTTCTAGCTTCT              | RT-PCR     |
| <i>FD</i>     | AGCTGTGTTGTTGGTTCACT        | GACAGGTGTTCTGTGCCTT                 | RT-PCR     |
| <i>ACT</i>    | GTGTTGGACTCTGGAGATGGTGTG    | GCCAAAGCAGTGATCTCTTTGCTC            | RT-PCR     |
| <i>SOC1</i>   | ACTAAAGAAGAAGATATGGTGAGG    | ATATCACAAAACCGTTTAGAAGCTTCGAGTTGTCA | genotype   |
| <i>soc1-2</i> | TGGTTCACGTAGTGGGCCATCG      | ATATCACAAAACCGTTTAGAAGCTTCGAGTTGTCA | genotype   |
| <i>abal-6</i> | GCTCGGAGTAAAGGCGGCCA        | CAGGAAGTCCCCGTGACGCC                | genotype   |

## SUPPLEMENTAL LITERATURE CITED

- Barrero JM, Piqueras P, González-Guzmán M, Serrano R, Rodríguez PL, Ponce MR, Micol JL** (2005) A mutational analysis of the ABA1 gene of *Arabidopsis thaliana* highlights the involvement of ABA in vegetative development. *J Exp Bot* **56**: 2071–2083
- Bouveret R, Schönrock N, Gruissem W, and Hennig L** (2006) Regulation of flowering time by *Arabidopsis* MSI1. *Development* **133**: 1693–1702
- David KM, Armbruster U, Tama N, Putterill J** (2006) *Arabidopsis* GIGANTEA protein is post-transcriptionally regulated by light and dark. *FEBS Lett* **580**: 1193–1197
- Fowler S, Lee K, Onouchi H, Samach A, Richardson K, Morris B, Coupland G, Putterill J** (1999) GIGANTEA: a circadian clock-controlled gene that regulates photoperiodic flowering in *Arabidopsis* and encodes a protein with several possible membrane-spanning domains. *EMBO J* **18**: 4679–4688
- Gregis V, Sessa A, Dorca-Fornell C, Kater MM** (2009) The *Arabidopsis* floral meristem identity genes AP1, AGL24 and SVP directly repress class B and C floral homeotic genes. *The Plant Journal* **60**: 626–637
- Gu Q, Ferrandiz C, Yanofsky MF, Martienssen R** (1998) The FRUITFULL MADS-box gene mediates cell differentiation during *Arabidopsis* fruit development. *Development* **125**: 1509–1517
- Guo H, Duong H, Ma N, Lin C** (1999) The *Arabidopsis* blue light receptor cryptochrome 2 is a nuclear protein regulated by a blue light-dependent post-transcriptional mechanism. *The Plant Journal* **19**: 279–287
- Hartmann U, Hohmann S, Nettesheim K, Wisman E, Saedler H, Huijser P** (2000) Molecular cloning of SVP: a negative regulator of the floral transition in *Arabidopsis*. *The Plant Journal* **21**: 351–360
- Huq E, Tepperman JM, Quail PH** (2000) GIGANTEA is a nuclear protein involved in phytochrome signaling in *Arabidopsis*. *Proc Natl Acad Sci USA* **97**: 9789–9794
- Jang S, Torti S, Coupland G** (2009) Genetic and spatial interactions between FT, TSF and SVP during the early stages of floral induction in *Arabidopsis*. *The Plant Journal* **60**: 614–625
- Koornneef M, Hanhart C, Vanderveen J** (1991) A Genetic and Physiological Analysis of Late Flowering Mutants in *Arabidopsis-Thaliana*. *Molecular and General Genetics* **229**: 57–66
- Laby RJ, Kincaid MS, Kim D, Gibson SI** (2001) The *Arabidopsis* sugar-insensitive mutants *sis4* and *sis5* are defective in abscisic acid synthesis and response. *The Plant Journal* **23**: 587–596
- Laubinger S, Marchal V, Gentilhomme J, Wenkel S, Adrian J, Jang S, Kulajta C, Braun H, Coupland G, Hoecker U** (2006) *Arabidopsis* SPA proteins regulate photoperiodic flowering and interact with the floral inducer CONSTANS to regulate its stability. *Development* **133**: 3213–3222
- Lee H, Suh S, Park E, Cho E, Ahn J, Kim S, Lee J, Kwon Y, Lee I** (2000) The AGAMOUS-LIKE 20 MADS domain protein integrates floral inductive pathways in *Arabidopsis*. *Genes*

- Lee I, Michaels SD, Masshardt AS, Amasino RM** (1994) The late-flowering phenotype of FRIGIDA and mutations in LUMINIDEPENDENS is suppressed in the Landsberg erecta strain of Arabidopsis. *The Plant Journal* **6**: 903–909
- Mathieu J, Yant LJ, Mürdter F, Küttner F, Schmid M** (2009) Repression of flowering by the miR172 target SMZ. *PLoS Biol* **7**: e1000148
- Michaels Scott D, Ditta G, Gustafson-Brown C, Pelaz S, Yanofsky M, Amasino Richard M** (2003) AGL24 acts as a promoter of flowering in Arabidopsis and is positively regulated by vernalization. *The Plant Journal* **33**: 867–874
- Mizoguchi T, Wright L, Fujiwara S, Cremer F, Lee K, Onouchi H, Mouradov A, Fowler S, Kamada H, Putterill J, et al** (2005) Distinct roles of GIGANTEA in promoting flowering and regulating circadian rhythms in Arabidopsis. *Plant Cell* **17**: 2255–2270
- Morris ER, Chevalier D, Walker JC** (2006) DAWDLE, a forkhead-associated domain gene, regulates multiple aspects of plant development. *Plant Physiol* **141**: 932–941
- Niyogi KK, Grossman AR, Björkman O** (1998) Arabidopsis mutants define a central role for the xanthophyll cycle in the regulation of photosynthetic energy conversion. *Plant Cell* **10**: 1121–1134
- Onouchi H, Igeno M, Perilleux C, Graves K, Coupland G** (2000) Mutagenesis of plants overexpressing CONSTANS demonstrates novel interactions among Arabidopsis flowering-time genes. *Plant Cell* **12**: 885–900
- Reed JW, Nagatani A, Elich TD, Fagan M, Chory J** (1994) Phytochrome A and Phytochrome B Have Overlapping but Distinct Functions in Arabidopsis Development. *Plant Physiol* **104**: 1139–1149
- Rubio S, Rodrigues A, Saez A, Dizon MB, Galle A, Kim T-H, Santiago J, Flexas J, Schroeder JI, Rodriguez PL** (2009) Triple loss of function of protein phosphatases type 2C leads to partial constitutive response to endogenous abscisic acid. *Plant Physiol* **150**: 1345–1355
- Yamaguchi A, Kobayashi Y, Goto K, Abe M, Araki T** (2005) TWIN SISTER OF FT (TSF) acts as a floral pathway integrator redundantly with FT. *Plant Cell Physiol* **46**: 1175–1189
- Yoo SK, Chung KS, Kim J, Lee JH, Hong SM, Yoo SJ, Yoo SY, Lee JS, Ahn JH** (2005) CONSTANS activates SUPPRESSOR OF OVEREXPRESSION OF CONSTANS 1 through FLOWERING LOCUS T to promote flowering in Arabidopsis. *Plant Physiol* **139**: 770–778
